# Supplementary material
Source: publisher figshare collection journal article supplement (https://frontiersin.figshare.com/ndownloader/files/18656264)
Supplement: Supplementary file [file 18656264]

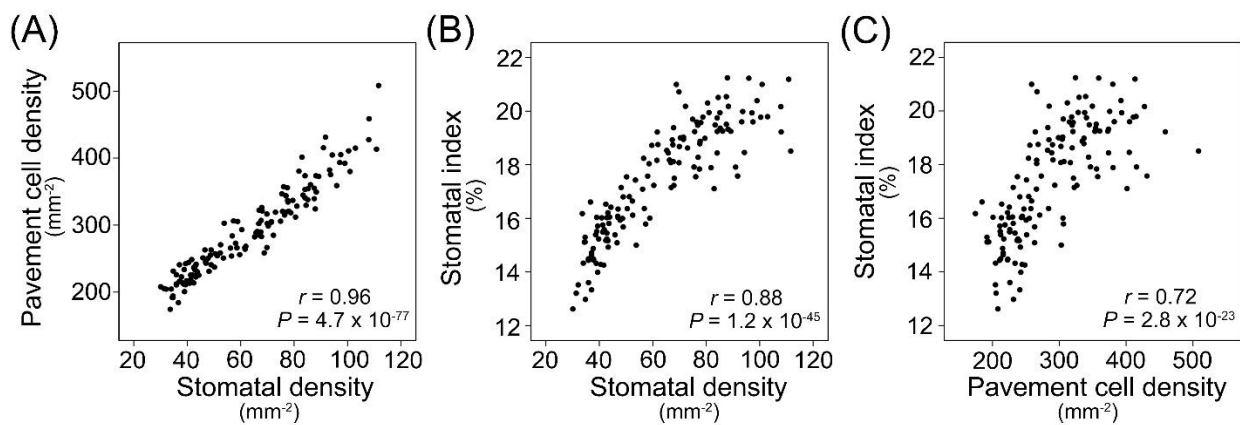

**Supplementary Figure S1.** Trait correlation in the *Ler* x *LI-0* RIL population. (A–C) Scatter plots showing the relationship between mean trait values of the 139 RILs. Pearson's coefficient ( $r$ ) and  $P$  values are indicated.
